# Supplementary material for: Blood Microbiota Modification After Myocardial Infarction Depends Upon Low‐Density Lipoprotein Cholesterol Levels
Source: PubMed Central journal article supplement — J Am Heart Assoc. 2019 Sep 28;8(19):e011797. doi: 10.1161/JAHA.118.011797 (PMC6806051; doi:10.1161/jaha.118.011797), 2019-09-28
Supplement: JAH3-8-e011797-s001.pdf [file JAH3-8-e011797-s001.pdf]

# **SUPPLEMENTAL MATERIAL**

**Table S1. Tests of normality.**

| <b>Quantitative variables</b>  | <b><i>p</i><br/>Shapiro-<br/>Wilk test<br/>Controls</b> | <b>Controls<br/>Passed<br/>normality test<br/>(alpha ≥ 0.05)?</b> | <b><i>p</i><br/>Shapiro-<br/>Wilk test<br/>Cases</b> | <b>Cases<br/>Passed<br/>normality test<br/>(alpha ≥ 0.05)?</b> | <b>Comparison test<br/>used in Table 1</b> |
|--------------------------------|---------------------------------------------------------|-------------------------------------------------------------------|------------------------------------------------------|----------------------------------------------------------------|--------------------------------------------|
| Age, years                     | 0,3266                                                  | Yes                                                               | 0,0241                                               | No                                                             | Mann-Whitney test                          |
| BMI, kg/m <sup>2</sup>         | 0,212                                                   | Yes                                                               | 0,0148                                               | No                                                             | Mann-Whitney test                          |
| Systolic blood pressure, mmHg  | 0,0006                                                  | No                                                                | 0,0004                                               | No                                                             | Mann-Whitney test                          |
| Diastolic blood pressure, mmHg | 0,0023                                                  | No                                                                | 0,1311                                               | Yes                                                            | Mann-Whitney test                          |
| Total cholesterol, mmol/L      | 0,2999                                                  | Yes                                                               | 0,0045                                               | No                                                             | Mann-Whitney test                          |
| Triglycerides, mmol/L          | <0,0001                                                 | No                                                                | <0,0001                                              | No                                                             | Mann-Whitney test                          |
| LDL cholesterol, mmol/L        | 0,1825                                                  | Yes                                                               | 0,2887                                               | Yes                                                            | Student t test                             |
| HDL cholesterol, mmol/L        | 0,0026                                                  | No                                                                | 0,0199                                               | No                                                             | Mann-Whitney test                          |
| Fasting blood glucose, mmol/L  | <0,0001                                                 | No                                                                | <0,0001                                              | No                                                             | Mann-Whitney test                          |

**Table S2. Results of multiple linear regression models predicting 16S in cases as compared to controls.**

|                                  | Model 1                |                       |         | Model 2                |                       |         |
|----------------------------------|------------------------|-----------------------|---------|------------------------|-----------------------|---------|
|                                  | $\beta$                | Standard error        | p-value | $\beta$                | Standard error        | p-value |
| Age, years                       | 0.658.10 <sup>5</sup>  | 0.619.10 <sup>5</sup> | 0.290   | 0.6793.10 <sup>5</sup> | 0.624.10 <sup>5</sup> | 0.278   |
| BMI, kg/m <sup>2</sup>           | 1.475.10 <sup>5</sup>  | 1.184.10 <sup>5</sup> | 0.214   | 1.433.10 <sup>5</sup>  | 1.235.10 <sup>5</sup> | 0.248   |
| Female vs male                   | 3.624.10 <sup>5</sup>  | 11.60.10 <sup>5</sup> | 0.755   | -1.339.10 <sup>5</sup> | 12.72.10 <sup>5</sup> | 0.916   |
| Smoking vs no smoking            | 39.56.10 <sup>5</sup>  | 11.82.10 <sup>5</sup> | 0.001   | 45.83.10 <sup>5</sup>  | 12.15.10 <sup>5</sup> | <0.0001 |
| Hypertension vs no hypertension  | -20.78.10 <sup>5</sup> | 12.93.10 <sup>5</sup> | 0.110   | -24.62.10 <sup>5</sup> | 13.15.10 <sup>5</sup> | 0.063   |
| Dyslipidemia vs non dyslipidemia | -12.41.10 <sup>5</sup> | 11.27.10 <sup>5</sup> | 0.272   | -14.08.10 <sup>5</sup> | 11.61.10 <sup>5</sup> | 0.227   |
| Diabetes vs no diabetes          | 17.62.10 <sup>5</sup>  | 12.32.10 <sup>5</sup> | 0.155   | 12.55.10 <sup>5</sup>  | 14.05.10 <sup>5</sup> | 0.373   |
| HDL-c, mmol/l                    |                        |                       |         | -4.827.10 <sup>5</sup> | 15.47.10 <sup>5</sup> | 0.755   |
| Fasting glucose, mmol/l          |                        |                       |         | 2.149.10 <sup>5</sup>  | 2.795.10 <sup>5</sup> | 0.443   |
| Case vs control                  | 41.51.10 <sup>5</sup>  | 12.11.10 <sup>5</sup> | 0.001   | 33.04.10 <sup>5</sup>  | 13.00.10 <sup>5</sup> | 0.012   |

**Table S3. Correlations between lipid parameters and blood microbiota (16S copies/ml of blood and relative proportion of taxa displayed in Figure 3 and Figure 4).**

| <b>All patients</b>    | <b>R (Spearman)</b>      |                        |                        |                      |
|------------------------|--------------------------|------------------------|------------------------|----------------------|
|                        | <b>Total Cholesterol</b> | <b>HDL Cholesterol</b> | <b>LDL cholesterol</b> | <b>Triglyc rides</b> |
| 16S copies/ml of blood | -0,11                    | 0,02                   | -0,12                  | 0,18                 |
| Aerococcaceae          | -0,21                    | -0,23                  | -0,11                  | 0,14                 |
| Caulobacteraceae       | -0,09                    | 0,06                   | -0,06                  | -0,17                |
| Caulobacterales        | -0,06                    | 0,07                   | -0,03                  | -0,16                |
| Chryseobacterium       | 0,08                     | 0,02                   | 0,08                   | -0,09                |
| Clostridia             | 0,02                     | -0,04                  | -0,01                  | 0,03                 |
| Clostridiales          | 0,02                     | -0,04                  | -0,01                  | 0,03                 |
| Clostridiales is XI    | 0,02                     | 0,01                   | 0,11                   | -0,18                |
| Gordonia               | -0,03                    | -0,06                  | 0,07                   | -0,06                |
| Hymenobacter           | 0,01                     | 0,04                   | 0,06                   | -0,14                |
| Neisseriaceae          | 0,03                     | -0,02                  | -0,09                  | 0,14                 |
| Neisseriales           | 0,03                     | -0,02                  | -0,09                  | 0,14                 |
| Nocardiaceae           | 0,05                     | -0,11                  | 0,18                   | 0,00                 |
| Propionibacteriaceae   | 0,15                     | 0,22                   | 0,04                   | -0,17                |
| Propionibacterium      | 0,15                     | 0,22                   | 0,05                   | -0,18                |
| Rhodococcus            | 0,14                     | -0,08                  | 0,22                   | 0,13                 |
| Sphingobacteria        | 0,03                     | 0,01                   | 0,14                   | -0,03                |
| Sphingobacteriales     | 0,03                     | 0,01                   | 0,14                   | -0,03                |

| <b>Cases</b>           | <b>R (Spearman)</b>      |                        |                        |                      |
|------------------------|--------------------------|------------------------|------------------------|----------------------|
|                        | <b>Total Cholesterol</b> | <b>HDL Cholesterol</b> | <b>LDL cholesterol</b> | <b>Triglyc rides</b> |
| 16S copies/ml of blood | 0,17                     | -0,11                  | 0,23                   | 0,07                 |
| Aerococcaceae          | 0,07                     | 0,01                   | 0,08                   | 0,15                 |
| Caulobacteraceae       | 0,10                     | 0,04                   | 0,07                   | -0,04                |
| Caulobacterales        | 0,08                     | 0,04                   | 0,04                   | -0,01                |
| Chryseobacterium       | 0,11                     | -0,01                  | 0,06                   | -0,06                |
| Clostridia             | -0,04                    | -0,01                  | -0,02                  | -0,06                |
| Clostridiales          | -0,04                    | -0,01                  | -0,02                  | -0,06                |
| Clostridiales is XI    | 0,10                     | -0,03                  | 0,11                   | 0,01                 |
| Gordonia               | 0,10                     | 0,06                   | 0,05                   | 0,05                 |
| Hymenobacter           | 0,02                     | -0,04                  | 0,01                   | -0,03                |
| Neisseriaceae          | 0,03                     | 0,08                   | 0,04                   | -0,03                |
| Neisseriales           | 0,03                     | 0,09                   | 0,04                   | -0,03                |
| Nocardiaceae           | 0,07                     | 0,12                   | 0,03                   | -0,02                |
| Propionibacteriaceae   | -0,03                    | -0,12                  | -0,05                  | -0,09                |
| Propionibacterium      | 0,02                     | -0,07                  | -0,02                  | -0,11                |
| Rhodococcus            | -0,13                    | 0,14                   | -0,14                  | -0,11                |
| Sphingobacteria        | 0,11                     | 0,03                   | 0,09                   | 0,04                 |
| Sphingobacteriales     | 0,11                     | 0,03                   | 0,09                   | 0,04                 |

Figure S1. Assessment of the background of the 16S qPCR and sequencing assays.

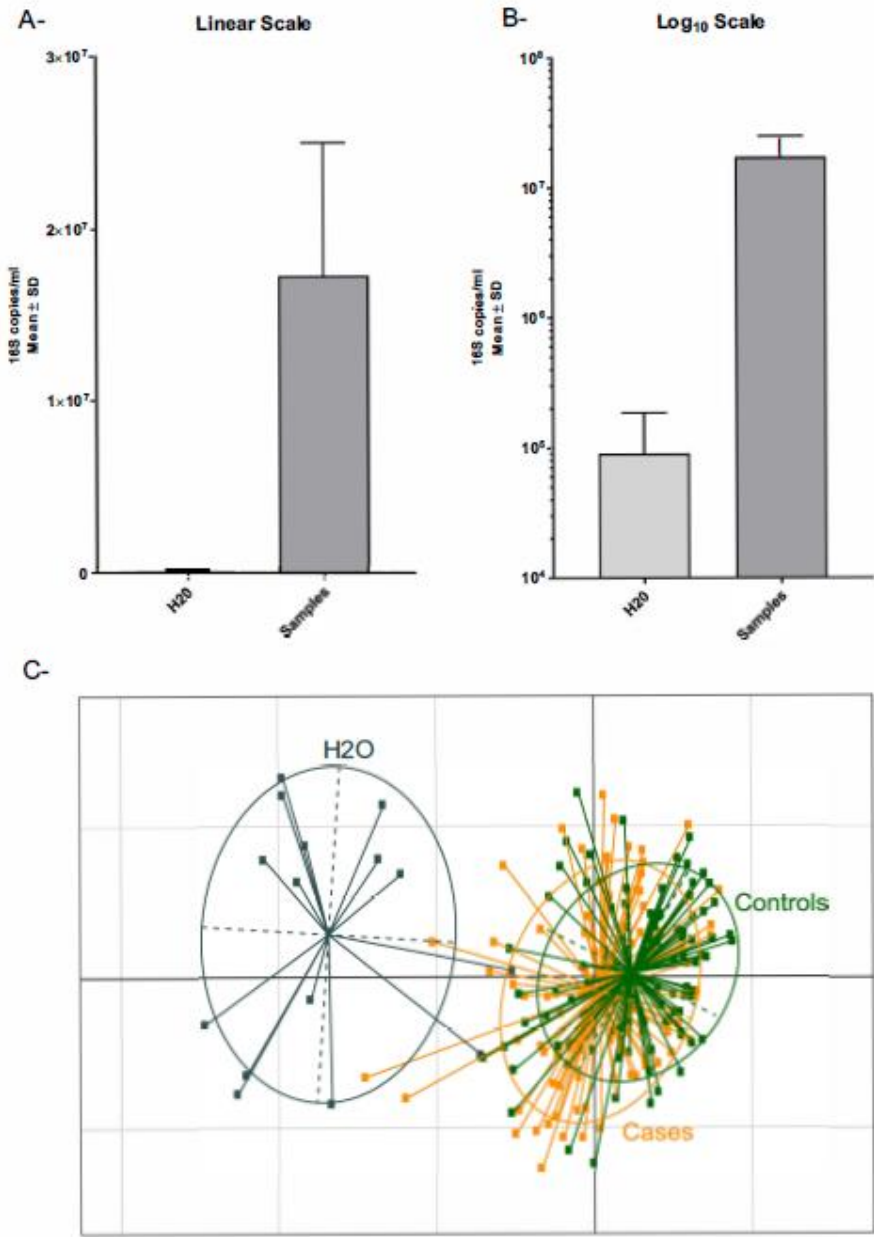

Comparison in linear scale (A) and log scale (B) by 16S qPCR between the blood samples from this study and the negative controls ran at the same time (negative controls were molecular grade water added in an empty tube, extracted and analyzed at the same time as the samples). (C) Comparison by PCoA analysis of the 16S sequencing of the blood samples (Control and Case) and water (H2O) using distance calculated with Generalized UniFrac with  $\alpha=0.2$ . qPCR: quantitative polymerase chain reaction; PCoA: principal coordinate analysis.

**Figure S2. PCoA analysis of the 16S sequencing of the blood samples (Controls and Cases) using distance calculated with Generalized UniFrac with alpha=0.2.**

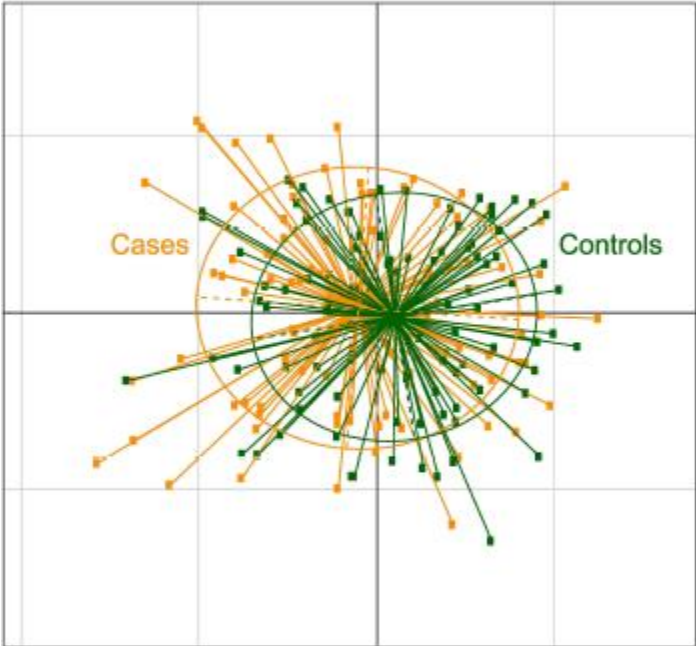

PCoA: principal coordinate analysis.

**Figure S3. Presence of Caulobacterales in blood of patient with MI tended to correlate with LVEF.**

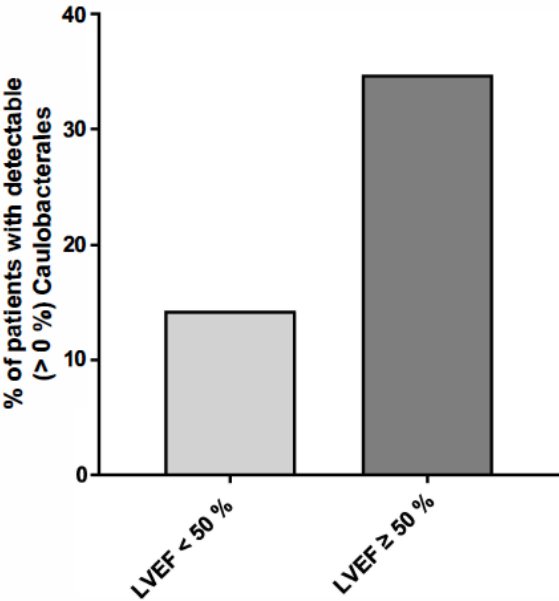

Mean of relative proportion of the Caulobacterales order in MI patients with LVEF inferior or superior/equal to 50 %. MI: myocardial infarction; LVEF: left ventricular ejection fraction.

**Figure S4. Interaction between LDL concentration and modification of blood bacterial 16S rDNA concentration in patients who underwent MI does not depend on statin treatment or time of sampling.**

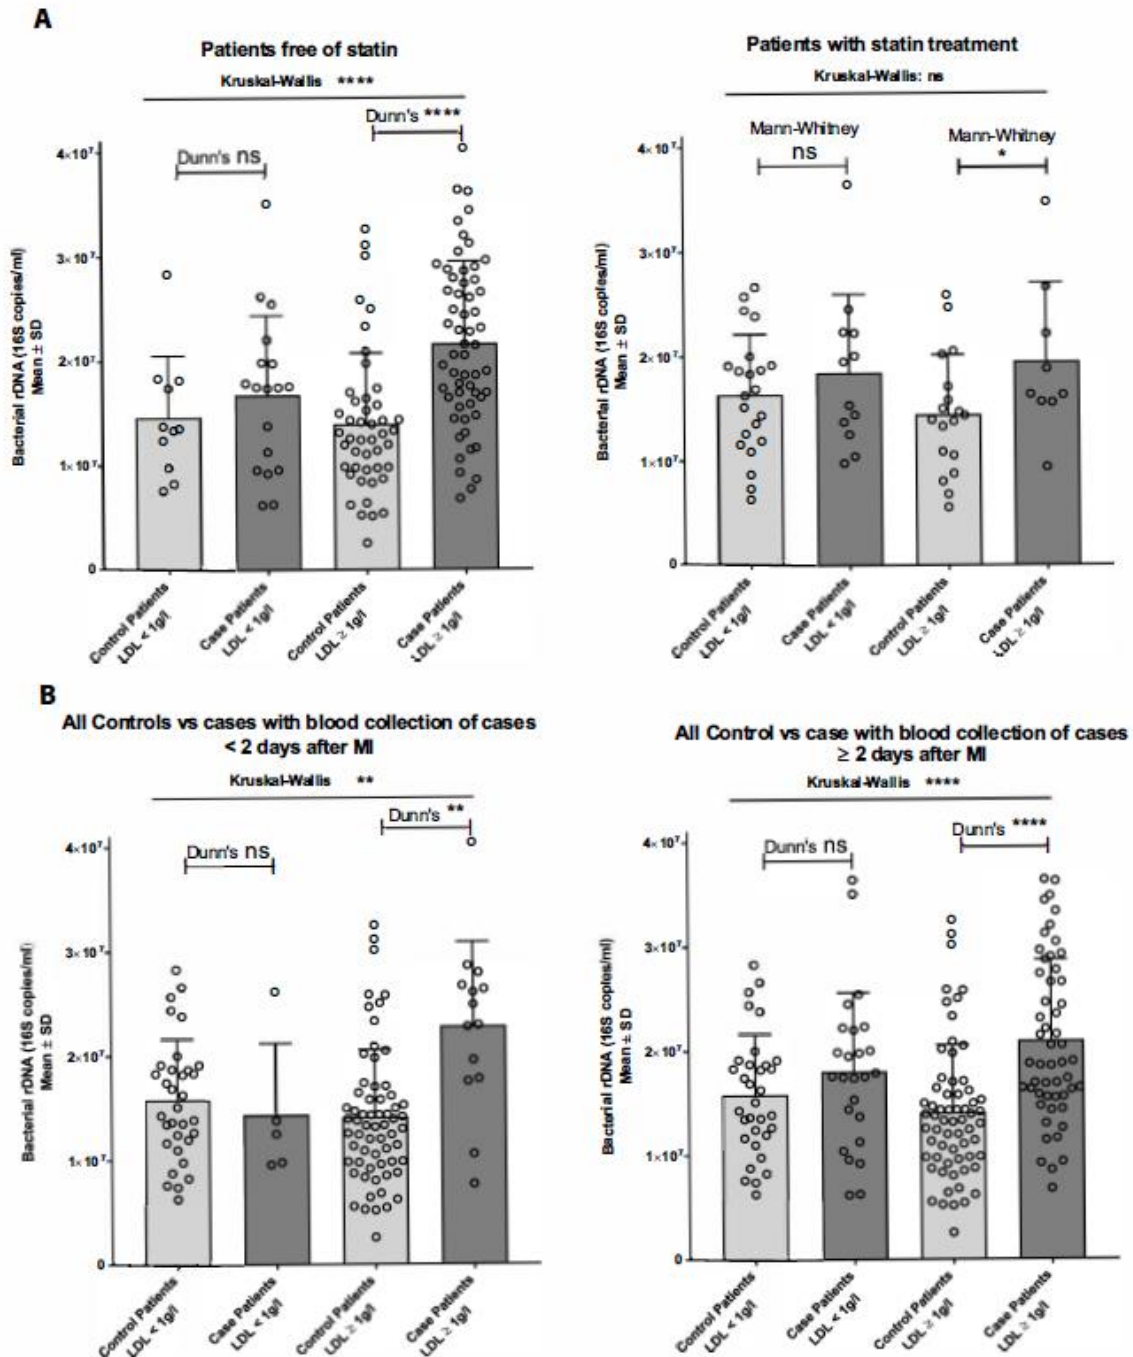

Mean concentrations (bar plots) and individual values (dot plots) of bacterial 16S rDNA assessed by qPCR in patients after myocardial infarction or control patients in subgroup of patients depending on LDL cholesterol concentration (\*  $p < 0.05$ ; \*\*  $p < 0.01$ ; \*\*\*  $p < 0.001$ ; \*\*\*\*  $p < 0.0001$ ; ns : not significant). **(A)** According to the statin treatment. **(B)** According to



the time ( $<2$  days or  $\geq 2$  days) of blood collection after MI for case patients. LDL: low density lipoprotein; rDNA: ribosomal deoxyribonucleic acid; MI: myocardial infarction; qPCR: quantitative polymerase chain reaction.
